# Supplementary material
Source: PubMed Central journal article supplement (PMC4694107)
Supplement: chest_144_1_48_ds01.pdf [file chest_144_1_48_ds01.pdf]

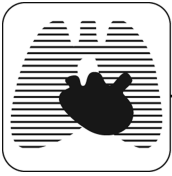

## Outcomes of Morbidly Obese Patients Receiving Invasive Mechanical Ventilation

### A Nationwide Analysis

*Gagan Kumar, MD; Tilottama Majumdar, MD, FCCP; Elizabeth R. Jacobs, MD, FCCP; Valerie Danesh, MS; Gaurav Dagar, MD; Abhishek Deshmukh, MD; Amit Taneja, MD; and Rahul Nanchal, MD, FCCP; from the Milwaukee Initiative in Critical Care Outcomes Research (MICCOR) Group of Investigators*

**e-Table 1.** ICD-9-CM codes used for selection of etiology associated with mechanical ventilation

|                                                          |                                                              |
|----------------------------------------------------------|--------------------------------------------------------------|
| Pneumonia                                                | 480-487, 507.0                                               |
| COPD exacerbation                                        | 491.1, 491.2                                                 |
| Asthma exacerbation                                      | 493.x1, 493.x2                                               |
| Cardiac arrest/ Ventricular fibrillation or flutter      | 427.41, 427.42, 427.5                                        |
| Acute coronary syndrome                                  | 410.x0, 410.x1                                               |
| Acute Congestive heart failure                           | 276.6, 428.21, 428.23, 428.31, 428.33, 428.41, 428.43        |
| Stroke, intracranial hemorrhage, subarachnoid hemorrhage | 433.x1, 432.9, 431, 430                                      |
| Severe sepsis                                            | See Martin et al. N Engl J Med. 2003 Apr 17;348(16):1546-54. |



**e-Table 2.** Multivariable analysis of risk factors associate with invasive mechanical ventilation

|                          | Odds ratio | 95% confidence interval |
|--------------------------|------------|-------------------------|
| Morbid Obesity           | 1.37       | 1.20-1.57               |
| Age group                |            |                         |
| 18-34                    | Reference  |                         |
| 35-49                    | 1.29       | 1.26-1.32               |
| 50-64                    | 1.38       | 1.35-1.41               |
| 65-79                    | 0.93       | 0.90-0.95               |
| Gender                   |            |                         |
| Male                     | Reference  |                         |
| Female                   | 0.79       | 0.78-0.80               |
| Race                     |            |                         |
| White                    | Reference  |                         |
| Black                    | 1.06       | 1.04-1.08               |
| Hispanic                 | 0.96       | 0.94-0.98               |
| Asian                    | 1.03       | 0.99-1.07               |
| Insurance                |            |                         |
| Medicare                 | Reference  |                         |
| Medicaid                 | 1.08       | 1.06-1.10               |
| Private                  | 1.25       | 1.23-1.28               |
| Self                     | 1.55       | 1.51-1.59               |
| Etiology                 |            |                         |
| Severe Sepsis            | 5.34       | 5.26-5.42               |
| Pneumonia                | 4.39       | 4.34-4.44               |
| COPD exacerbation        | 1.59       | 1.56-1.62               |
| Asthma exacerbation      | 1.11       | 1.08-1.14               |
| CHF exacerbation         | 1.20       | 1.17-1.23               |
| Acute coronary syndrome  | 1.92       | 1.88-1.96               |
| Cardiac arrest           | 23.5       | 22.9-24.1               |
| Stroke                   | 3.11       | 3.05-3.18               |
| Number of organ failures |            |                         |
| 0                        | Reference  |                         |
| 1                        | 2.89       | 2.85-2.93               |
| 2                        | 5.15       | 5.06-5.25               |
| 3                        | 8.11       | 7.90-8.32               |
| 4                        | 10.3       | 9.94-10.8               |
| 5 or 6                   | 12.5       | 11.4-13.7               |
| Admission type           |            |                         |
| Elective                 | Reference  |                         |
| Urgent care              | 1.19       | 1.16-1.22               |
| Emergency room           | 1.47       | 1.44-1.49               |
| Trauma                   | 15.2       | 14.5-15.9               |
| Others                   | 1.44       | 1.41-1.48               |

*Online supplements are not copyedited prior to posting.*

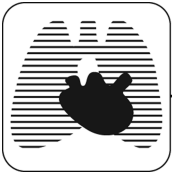

**e-Table 3.** Models used for examining odds ratio of mortality - morbidly obese vs. non obese.

|                                                                                            | OR   | 95% CI    |
|--------------------------------------------------------------------------------------------|------|-----------|
| Model A:<br>Unadjusted                                                                     | 0.49 | 0.47-0.51 |
| Model B:<br>Adjusting for age, gender, race, hospital characteristics, and co-morbid index | 0.57 | 0.55-0.59 |
| Model C:<br>Adjusting for variables in model B and causes for IMV                          | 0.68 | 0.65-0.71 |
| Model D:<br>Adjusting for variables in model C and organ failures                          | 0.71 | 0.69-0.74 |
| Model E (final model)<br>Adjusting for variables in model D and interaction variables      | 0.89 | 0.74-1.06 |
| Sensitivity analysis                                                                       | 0.89 | 0.73-1.08 |



**e-Table 4.** Multivariate analysis of risk factors associated with prolonged IMV (>96 hrs) among IMV patients.

|                                    | Odds ratio | 95% confidence interval |
|------------------------------------|------------|-------------------------|
| Morbid Obesity                     | 0.98       | 0.78-1.23               |
| Age group                          |            |                         |
| 18-34                              | Reference  |                         |
| 35-49                              | 1.18       | 1.15-1.21               |
| 50-64                              | 1.27       | 1.15-1.31               |
| 65-79                              | 1.14       | 1.11-1.16               |
| Gender*                            |            |                         |
| Male                               | Reference  |                         |
| Female                             | 1.00       | 0.99-1.01               |
| Race                               |            |                         |
| White                              | Reference  |                         |
| Black                              | 1.15       | 1.13-1.17               |
| Hispanic                           | 1.17       | 1.14-1.19               |
| Asian                              | 1.06       | 1.01-1.11               |
| Hospital Teaching Status           |            |                         |
| Non-Teaching                       | Reference  |                         |
| Teaching                           | 1.31       | 1.29-1.32               |
| Hospital Bed Size                  |            |                         |
| Small                              | Reference  |                         |
| Medium                             | 0.92       | 0.91-0.94               |
| Large                              | 1.00       | 0.98-1.01               |
| Charlson-Deyo's Co-morbidity index |            |                         |
| 0                                  | Reference  |                         |
| 1-3                                | 1.03       | 1.01-1.04               |
| 4-6                                | 0.92       | 0.90-0.94               |
| ≥7                                 | 0.91       | 0.89-0.93               |
| Number of organ failures           |            |                         |
| 0                                  | Reference  |                         |
| 1                                  | 1.31       | 1.29-1.32               |
| 2                                  | 1.46       | 1.43-1.48               |
| 3                                  | 1.48       | 1.45-1.51               |
| 4                                  | 1.48       | 1.42-1.53               |
| 5                                  | 1.48       | 1.37-1.58               |
| Year                               |            |                         |
| 2004                               | Reference  |                         |
| 2005                               | 1.00       | 0.99-1.02               |
| 2006                               | 0.98       | 0.96-1.00               |
| 2007                               | 0.90       | 0.88-0.91               |
| 2008                               | 0.86       | 0.87-0.89               |

*Online supplements are not copyedited prior to posting.*



**e-Table 5.** Multivariate analysis of risk factors associated with tracheostomy among IMV patients.

|                                    | Odds ratio | 95% confidence interval |
|------------------------------------|------------|-------------------------|
| Morbid Obesity                     | 2.19       | 1.77-2.69               |
| Age group                          |            |                         |
| 18-34                              | Reference  |                         |
| 35-49                              | 1.07       | 1.03-1.10               |
| 50-64                              | 1.09       | 1.05-1.12               |
| ≥65                                | 0.92       | 0.88-0.94               |
| Gender*                            |            |                         |
| Male                               | Reference  |                         |
| Female                             | 0.95       | 0.94-0.97               |
| Race                               |            |                         |
| White                              | Reference  |                         |
| Black                              | 1.16       | 1.13-1.19               |
| Hispanic                           | 1.11       | 10.7-1.15               |
| Asian                              | 1.10       | 1.01-1.18               |
| Hospital Teaching Status           |            |                         |
| Non-Teaching                       | Reference  |                         |
| Teaching                           | 1.66       | 1.63-1.68               |
| Hospital Bed Size                  |            |                         |
| Small                              | Reference  |                         |
| Medium                             | 1.35       | 1.31-1.40               |
| Large                              | 1.61       | 1.55-1.96               |
| Charlson-Deyo's Co-morbidity index |            |                         |
| 0                                  | Reference  |                         |
| 1-3                                | 0.82       | 0.80-0.83               |
| 4-6                                | 0.63       | 0.61-0.65               |
| ≥7                                 | 0.68       | 0.65-0.71               |
| Number of organ failures           |            |                         |
| 0                                  | Reference  |                         |
| 1                                  | 1.05       | 1.03-1.07               |
| 2                                  | 1.01       | 0.98-1.03               |
| 3                                  | 0.90       | 0.86-0.93               |
| 4                                  | 0.73       | 0.69-0.78               |
| 5 or 6                             | 0.63       | 0.55-0.71               |
| Year                               |            |                         |
| 2004                               | Reference  |                         |
| 2005                               | 0.96       | 0.94-0.99               |
| 2006                               | 0.94       | 0.92-0.97               |
| 2007                               | 0.93       | 0.91-0.95               |
| 2008                               | 0.88       | 0.85-0.90               |

*Online supplements are not copyedited prior to posting.*



**e-Table 6.** Multivariate analysis of risk factors associated with discharge to home among IMV patients.

|                                    | Odds ratio | 95% confidence interval |
|------------------------------------|------------|-------------------------|
| Morbid Obesity                     | 1.10       | 0.87-1.38               |
| Age group                          |            |                         |
| 18-34                              | Reference  |                         |
| 35-49                              | 0.84       | 0.81-0.85               |
| 50-64                              | 0.62       | 0.60-0.63               |
| ≥65                                | 0.30       | 0.29-0.31               |
| Gender*                            |            |                         |
| Male                               | Reference  |                         |
| Female                             | 0.84       | 0.82-0.85               |
| Race                               |            |                         |
| White                              | Reference  |                         |
| Black                              | 1.18       | 1.16-1.21               |
| Hispanic                           | 1.48       | 1.44-1.52               |
| Asian                              | 1.55       | 1.45-1.65               |
| Insurance status                   |            |                         |
| Medicare                           | Reference  |                         |
| Medicaid                           | 1.29       | 1.25-1.31               |
| Private                            | 1.42       | 1.39-1.45               |
| Uninsured                          | 2.72       | 2.64-2.79               |
| Hospital Teaching Status           |            |                         |
| Non-Teaching                       | Reference  |                         |
| Teaching                           | 1.14       | 1.13-1.15               |
| Hospital Bed Size                  |            |                         |
| Small                              | Reference  |                         |
| Medium                             | 1.43       | 1.40-1.47               |
| Large                              | 1.42       | 1.39-1.45               |
| Charlson-Deyo's Co-morbidity index |            |                         |
| 0                                  | Reference  |                         |
| 1-3                                | 0.99       | 0.98-1.01               |
| 4-6                                | 0.96       | 0.93-0.98               |
| ≥7                                 | 0.75       | 0.72-0.78               |
| Number of organ failures           |            |                         |
| 0                                  | Reference  |                         |
| 1                                  | 0.81       | 0.80-0.82               |
| 2                                  | 0.73       | 0.71-0.74               |
| 3                                  | 0.71       | 0.68-0.74               |
| 4                                  | 0.63       | 0.58-0.67               |
| 5 or 6                             | 0.66       | 0.56-0.78               |

*Online supplements are not copyedited prior to posting.*



**e-Table 7.** Multivariate analysis of risk factors associated with discharge to nursing home among IMV patients.

|                                    | Odds ratio | 95% confidence interval |
|------------------------------------|------------|-------------------------|
| Morbid Obesity                     | 0.74       | 0.56-0.99               |
| Age group                          |            |                         |
| 18-34                              | Reference  |                         |
| 35-49                              | 1.13       | 1.09-1.15               |
| 50-64                              | 1.44       | 1.41-1.48               |
| ≥65                                | 2.81       | 2.74-2.89               |
| Gender*                            |            |                         |
| Male                               | Reference  |                         |
| Female                             | 1.16       | 1.14-1.17               |
| Race                               |            |                         |
| White                              | Reference  |                         |
| Black                              | 0.92       | 0.90-0.94               |
| Hispanic                           | 0.75       | 0.73-0.77               |
| Asian                              | 0.67       | 0.63-0.72               |
| Insurance status                   |            |                         |
| Medicare                           | Reference  |                         |
| Medicaid                           | 0.80       | 0.78-0.82               |
| Private                            | 0.68       | 0.67-0.69               |
| Uninsured                          | 0.37       | 0.36-0.38               |
| Hospital Teaching Status           |            |                         |
| Non-Teaching                       | Reference  |                         |
| Teaching                           | 1.16       | 1.14-1.17               |
| Hospital Bed Size                  |            |                         |
| Small                              | Reference  |                         |
| Medium                             | 0.95       | 0.92-0.96               |
| Large                              | 1.00       | 0.99-1.02               |
| Charlson-Deyo's Co-morbidity index |            |                         |
| 0                                  | Reference  |                         |
| 1-3                                | 0.87       | 0.85-0.88               |
| 4-6                                | 0.82       | 0.80-0.84               |
| ≥7                                 | 0.80       | 0.78-0.84               |
| Number of organ failures           |            |                         |
| 0                                  | Reference  |                         |
| 1                                  | 1.20       | 1.18-1.22               |
| 2                                  | 1.28       | 1.26-1.31               |
| 3                                  | 1.30       | 1.25-1.34               |
| 4                                  | 1.34       | 1.26-1.42               |
| 5 or 6                             | 1.35       | 1.17-1.54               |

*Online supplements are not copyedited prior to posting.*



**e-Table 8.** Multivariate analysis of risk factors associated with discharge to home with health care among IMV patients.

|                                    | Odds ratio (95% confidence interval) | p-value   |
|------------------------------------|--------------------------------------|-----------|
| Morbid Obesity                     | 1.51                                 | 1.12-2.04 |
| Age group                          |                                      |           |
| 18-34                              | Reference                            |           |
| 35-49                              | 1.36                                 | 1.31-1.42 |
| 50-64                              | 1.72                                 | 1.65-1.79 |
| ≥65                                | 1.60                                 | 1.53-1.67 |
| Gender*                            |                                      |           |
| Male                               | Reference                            |           |
| Female                             | 1.09                                 | 1.08-1.11 |
| Race                               |                                      |           |
| White                              | Reference                            |           |
| Black                              | 0.92                                 | 0.90-0.96 |
| Hispanic                           | 0.98                                 | 0.95-1.02 |
| Asian                              | 1.02                                 | 0.94-1.11 |
| Hospital Teaching Status           |                                      |           |
| Non-Teaching                       | Reference                            |           |
| Teaching                           | 1.07                                 | 1.05-1.09 |
| Hospital Bed Size                  |                                      |           |
| Small                              | Reference                            |           |
| Medium                             | 1.13                                 | 1.09-1.16 |
| Large                              | 1.34                                 | 1.30-1.38 |
| Charlson-Deyo's Co-morbidity index |                                      |           |
| 0                                  | Reference                            |           |
| 1-3                                | 1.27                                 | 1.24-1.30 |
| 4-6                                | 1.49                                 | 1.44-1.54 |
| ≥7                                 | 2.20                                 | 2.11-2.29 |
| Number of organ failures           |                                      |           |
| 0                                  | Reference                            |           |
| 1                                  | 0.97                                 | 0.96-0.99 |
| 2                                  | 0.95                                 | 0.92-0.97 |
| 3                                  | 0.94                                 | 0.90-0.98 |
| 4                                  | 0.89                                 | 0.82-0.97 |
| 5 or 6                             | 0.84                                 | 0.69-1.03 |

*Online supplements are not copyedited prior to posting.*
